# Supplementary material for: Sphingosine regulates the NLRP3-inflammasome and IL-1β release from macrophages
Source: PubMed Central journal article supplement (PMC3491674; doi:10.1002/eji.201142079), 2011-12-27
Supplement: eji0042-0716-SD1.pdf [file eji0042-0716-SD1.pdf]

# European Journal of Immunology

**Supporting Information**

**for**

**DOI 10.1002/eji.201142079**

**Sphingosine regulates the NLRP3-inflammasome and IL-1 $\beta$  release from macrophages**

Nadia M. Luheshi, James A. Giles, Gloria Lopez-Castejon and David Brough

# Supporting information Figure 1

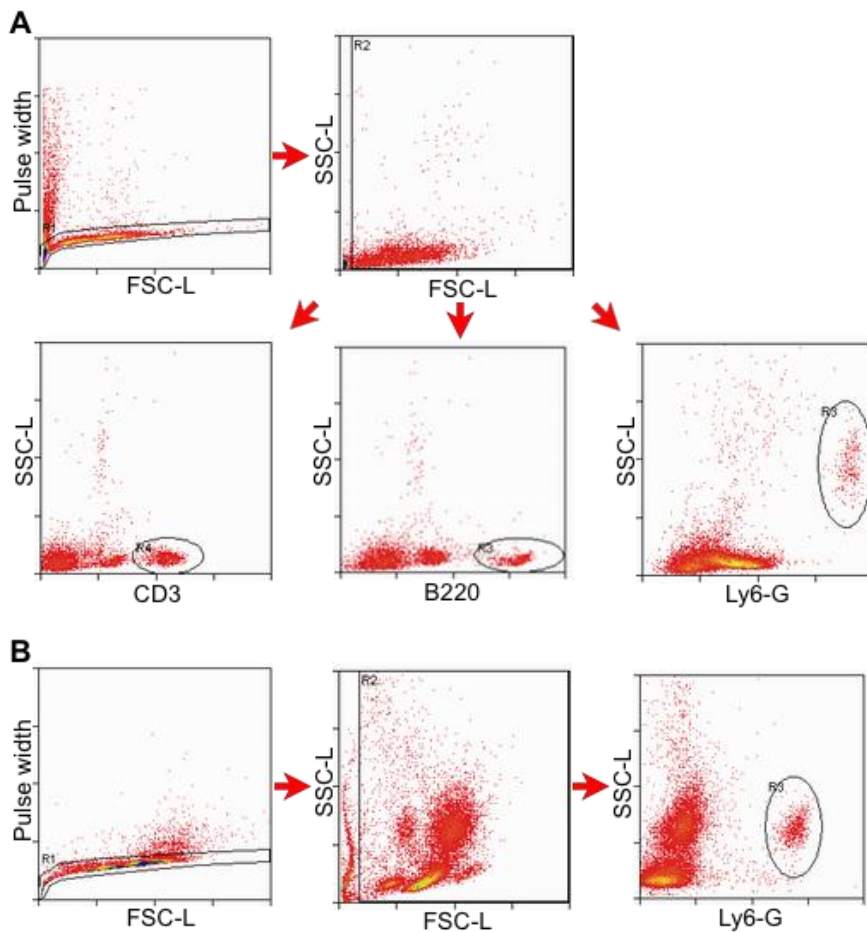

Representative gating strategies for: **A.** *In vivo* experiments analysing the effect of FTY720 injection on T cell (CD3+), B cell (B220) and neutrophil (Ly6G+) numbers in blood. **B.** *In vivo* experiments analysing the effect of FTY720 injection on neutrophil (Ly6-G+) numbers in peritoneal lavage fluid.
